# Supplementary material
Source: Springer Nature journal article supplement (https://www.springermedizin.de/resource/supplementary/12936_2007_400_MOESM5_ESM.pdf/9547722)

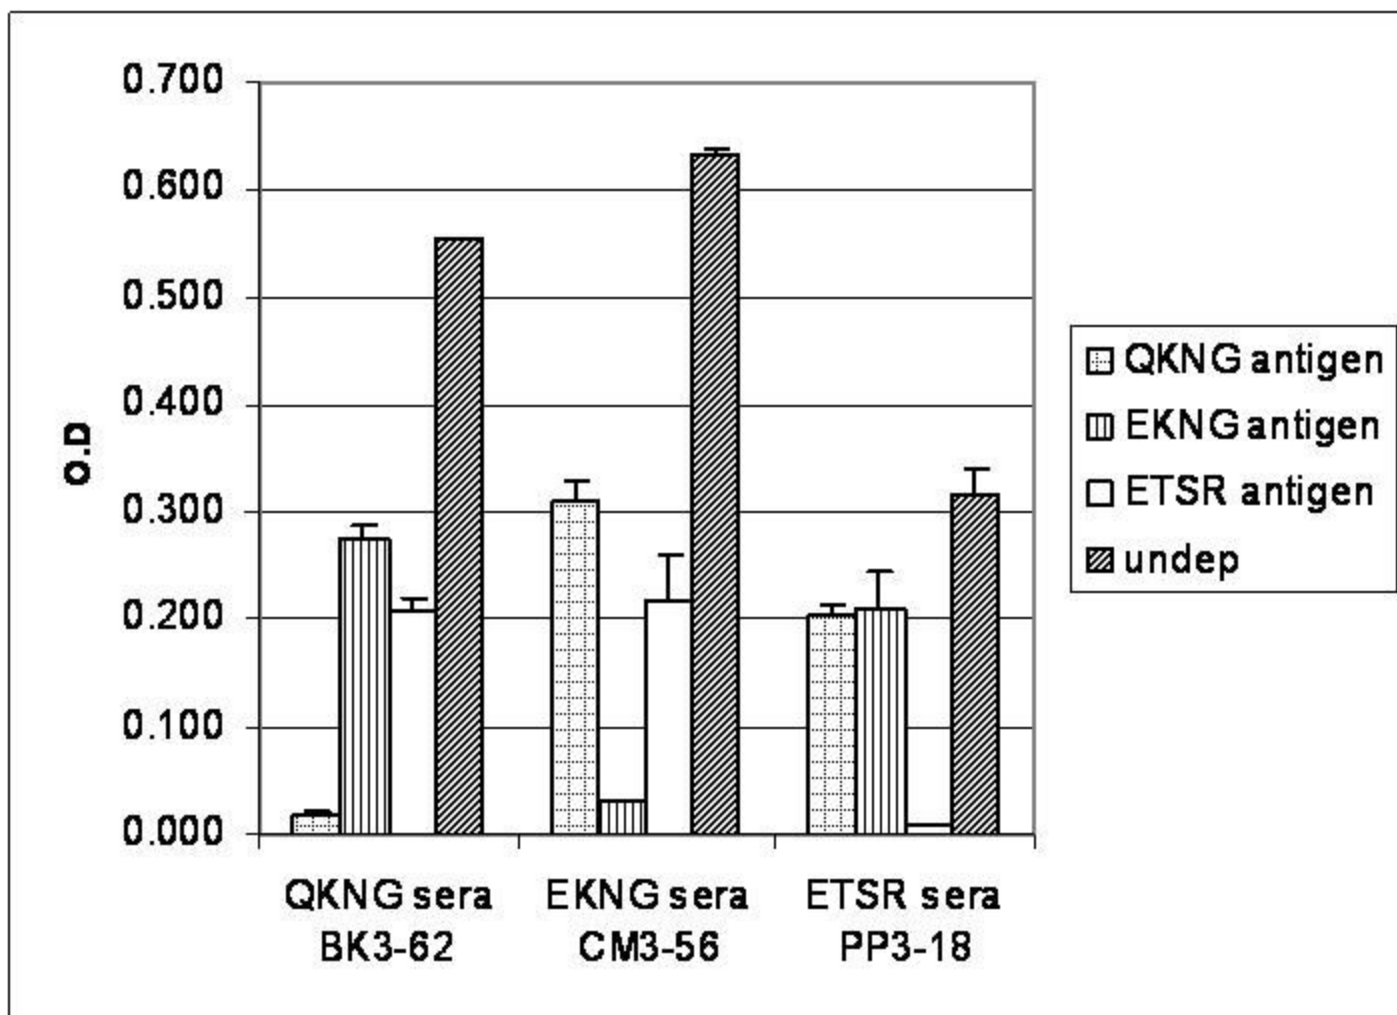

Figure 3b

Supplement: MOESM5 [file 9547722]
